# Supplementary material
Source: PubMed Central journal article supplement (PMC3993879)
Supplement: pr400866r_si_001.pdf [file pr400866r_si_001.pdf]

**Supporting Information:** This material is available free of charge via the Internet at <http://pubs.acs.org>.

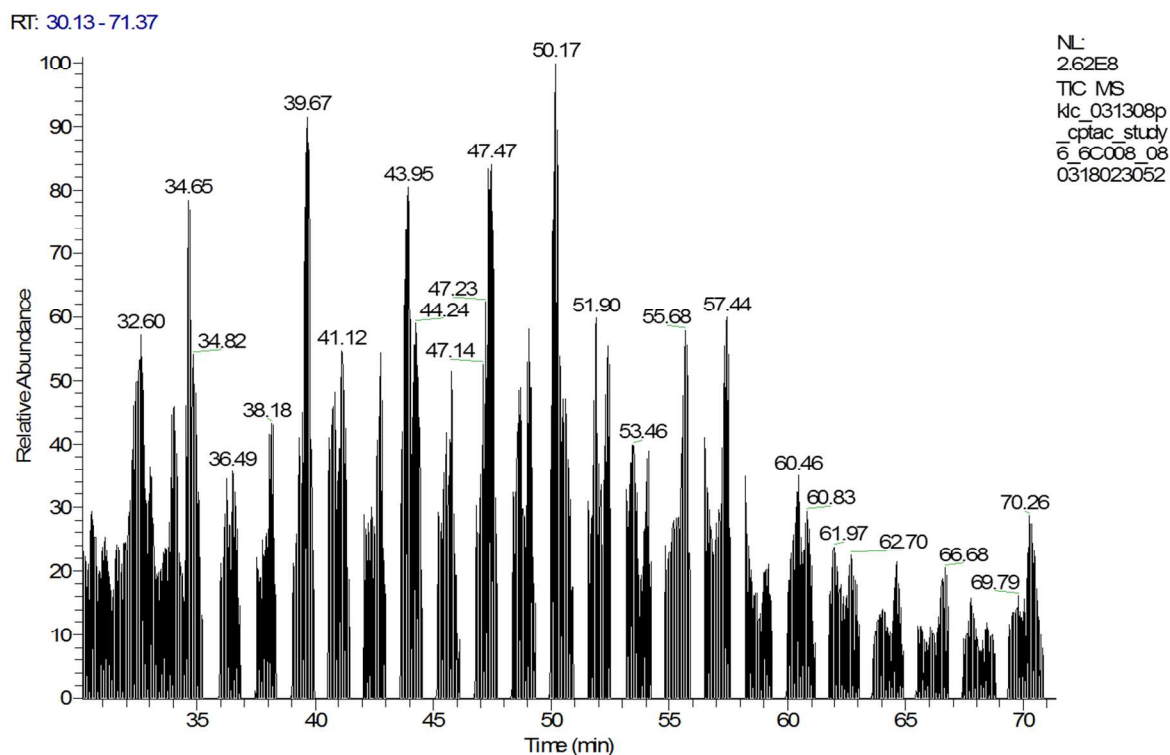

**Supplementary Figure 1: Portion of the CPTAC Study 6C experiment's chromatogram.**

The distinctive saw tooth pattern is indicative of electrospray ionization inefficiency.

### **Supplementary Note 1- Minus vs. Average Reveals Systematic Bias**

Proteomics researchers employ minus vs. average (MA) plots to visually detect systematic bias. They were originally designed to analyze systematic bias R/G channels in microarray channels<sup>2</sup> but later adapted to analyze systematic bias and its correction in quantitative proteomics<sup>3, 4</sup> (Online Methods). MA plots are essentially a ratio versus intensity ordinate system rescaled and rotated 45 degrees to allow easier observations of both linear and non-linear trends<sup>3</sup>. In Figure 3, locally weighted regression lines are added to the ordinate systems, deviations from  $M=0$  indicate systematic bias.

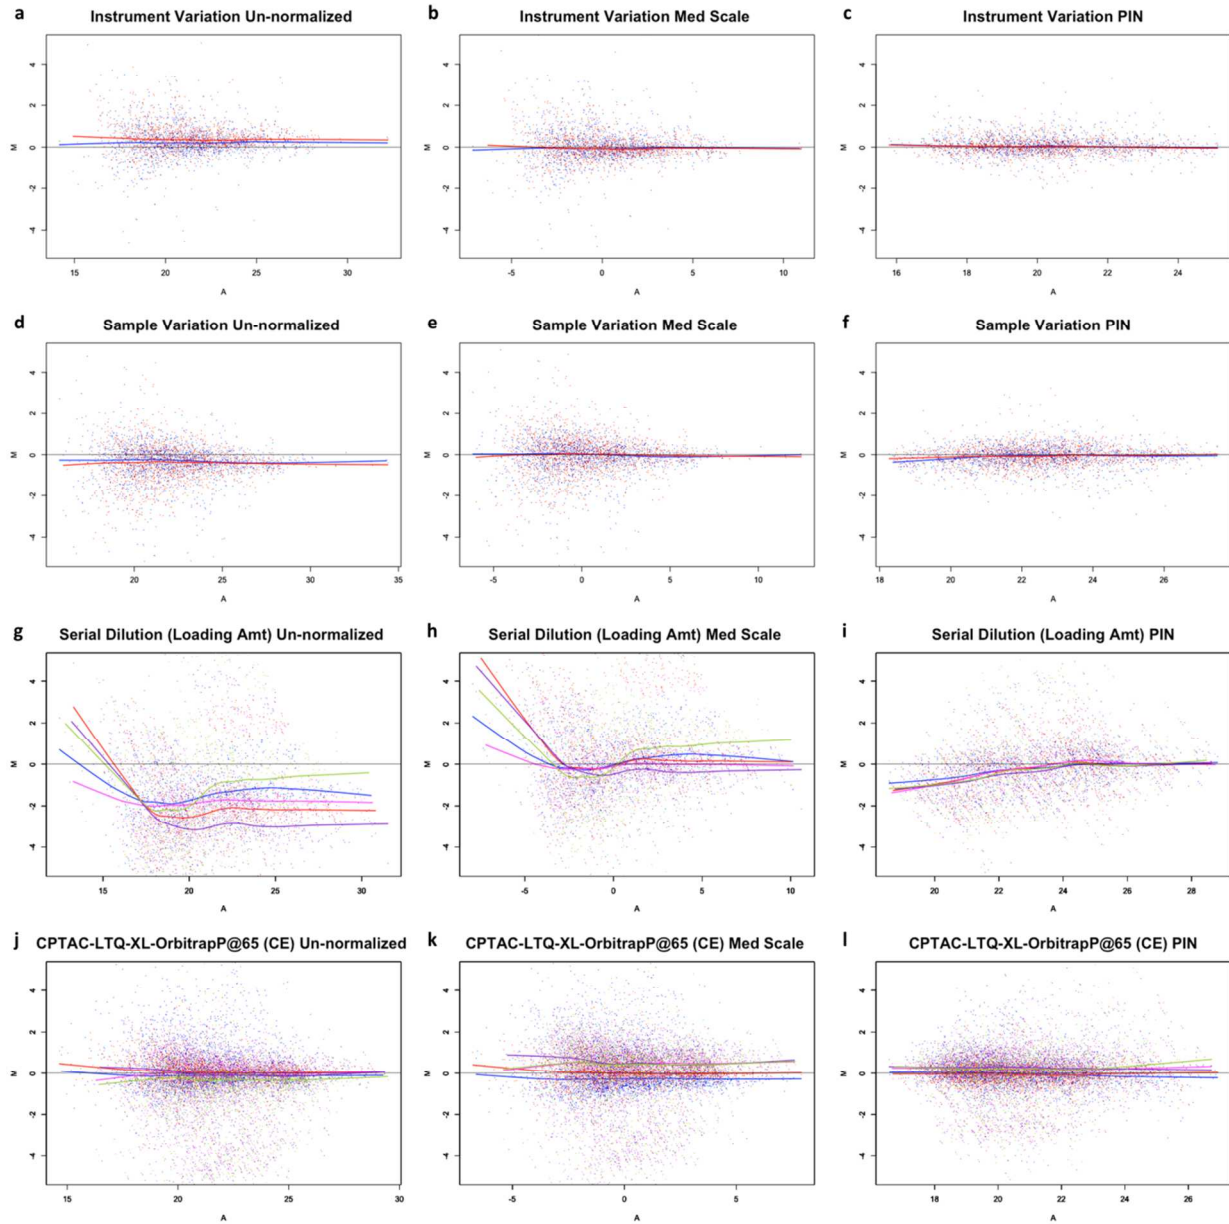

**Supplementary Figure 2: Minus vs. Average plots for four experiments: Instrument Variability, Sample Variability, Serial Dilution, and CPTAC Study 6 C vs. E.**

Each row contains three MA scatter plots with locally weighted regression lines (solid lines) for an experiment. For each experiment, the first MA plot is the un-normalized data, the second MA plot is the data normalized by median scale, and the third scatter plot is the data normalized by

PIN. (a-c) MA plots for Instrument Variability experiments. (d-f) MA plots for sample variability experiments. (g-i) MA plots for Serial Dilution experiments (j-l) MA plots for CPTAC C vs. E experiments.

## Supplementary Note 2- Variables and Equations Used in Analysis

| <i>Description</i>                | <i>Variable / Equation</i>                                                                      | <i>Eq. #</i> |
|-----------------------------------|-------------------------------------------------------------------------------------------------|--------------|
| Peptide signal index              | $i$                                                                                             |              |
| Run index                         | $j$                                                                                             |              |
| Predicted peptide ratio           | $m_i^*$                                                                                         |              |
| Total # of runs (replicates)      | $n$                                                                                             |              |
| Total # of peptide signals in run | $p$                                                                                             |              |
| Measured peptide intensity        | $x_i$                                                                                           |              |
| Normalized peptide intensity      | $x'_i$                                                                                          |              |
| Average (A in MA transformation)  | $a_i = (\log_2 x_{ij=1} - \log_2 x_{ij=2})/2$                                                   | Eq. 1        |
| Minus (M in MA transformation)    | $m_i = \log_2 x_{ij=1} - \log_2 x_{ij=2}$                                                       | Eq. 2        |
| MA convoluted peptide intensity   | $m'_i = m_i - m_i^*$                                                                            | Eq. 3        |
| MA de-convolution                 | $x'_{ji=1} = 2^{(m'_i+2a_i)/2}$ , $x'_{ji=2} = 2^{(m'_i-2a_i)/2}$                               | Eq. 4        |
| Inter-run Mean                    | $\mu_i = \frac{\sum_{j=1}^n x_{ji}}{n}$                                                         | Eq. 5        |
| Intra-run Mean                    | $\mu_j = \frac{\sum_{i=1}^p x_{ji}}{p}$                                                         | Eq. 6        |
| Inter-run Variance                | $\sigma_i^2 = \frac{\sum_{j=1}^n x_{ji}^2}{n} - \left( \frac{\sum_{j=1}^n x_{ji}}{n} \right)^2$ | Eq. 7        |
| Intra-run Variance                | $\sigma_j^2 = \frac{\sum_{i=1}^p x_{ji}^2}{p} - \left( \frac{\sum_{i=1}^p x_{ji}}{p} \right)^2$ | Eq. 8        |
| Standard Deviation                | $\sigma = \sqrt{\sigma^2}$                                                                      | Eq. 9        |
| Pooled Estimate of Variance       | $PEV = \frac{(n_1 - 1)\sigma_{m_1}^2 - (n_2 - 1)\sigma_{m_2}^2}{(n_1 - 1) + (n_2 - 1)} \dots$   | Eq. 10       |
| Coefficient of Variation          | $CV = \frac{\sigma}{\mu}$                                                                       | Eq. 11       |

## REFERENCES

1. Bellew, M. et al. A suite of algorithms for the comprehensive analysis of complex protein mixtures using high-resolution LC-MS. *Bioinformatics* **22**, 1902-1909 (2006).
2. Dudoit, S., Yang, Y.H., Callow, M.J. & Speed, T.P. Statistical methods for identifying differentially expressed genes in replicated cDNA microarray experiments. *Statistica Sinica* **12**, 111-139 (2002).
3. Callister, S. et al. Normalization approaches for removing systematic biases associated with mass spectrometry and label-free proteomics. *Journal of Proteome Research* **5**, 277-286 (2006).
4. Kulima, K. et al. Development and Evaluation of Normalization Methods for Label-free Relative Quantification of Endogenous Peptides. *Mol Cell Proteomics* **8**, 2285-2295 (2009).
